# Supplementary material for: Sex-Specific Risk Factors for Short- and Long-Term Outcomes after Surgery in Patients with Infective Endocarditis
Source: MDPI journal article supplement (doi:10.3390/jcm11071875), 2022-03-28
Supplement: s1 [file s1]

**Table S1:** Pre- and intraoperative characteristics associated with 30-day mortality ( $p \leq 0.1$ )

|                                         | Overall                             |                                        |                     | Men<br>(n=308)                        |                                          |                     | Women<br>(n=105)                     |                                          |                     | Sex-specific<br>interaction |
|-----------------------------------------|-------------------------------------|----------------------------------------|---------------------|---------------------------------------|------------------------------------------|---------------------|--------------------------------------|------------------------------------------|---------------------|-----------------------------|
|                                         | 30-day<br>survivors<br>(n=339, 82%) | 30-day<br>non-survivors<br>(n=74, 18%) | <i>p</i> -<br>Value | 30-day<br>survivors<br>(n=262, 85.1%) | 30-day<br>non-survivors<br>(n=46, 14,9%) | <i>p</i> -<br>Value | 30-day<br>survivors<br>(n=77, 73.3%) | 30-day<br>non-survivors<br>(n=28, 26.7%) | <i>p</i> -<br>Value | <i>p</i> -Value             |
| Female gender                           | 77 (2.7%)                           | 28 (37.8%)                             | <b>0.007</b>        |                                       |                                          |                     |                                      |                                          |                     |                             |
| Age, years                              | 63 (50;72)                          | 69 (58;77)                             | <b>0.001</b>        | 63 (50;72)                            | 69 (51;76)                               | <b>0.032</b>        | 64 (52;73)                           | 69 (61;77)                               | <b>0.025</b>        |                             |
| Age $\geq$ 65 years                     | 157 (46.3%)                         | 47 (63.5%)                             | <b>0.007</b>        | 121 (46.2%)                           | 27 (58.7%)                               | 0.117               | 36 (46.8%)                           | 20 (71.4%)                               | <b>0.025</b>        | 0.347                       |
| Age $\geq$ 70 years                     | 101 (29.8%)                         | 36 (48.6%)                             | <b>0.002</b>        | 75 (28.6%)                            | 22 (47.8%)                               | <b>0.010</b>        | 26 (33.8%)                           | 14 (50.0%)                               | 0.130               | 0.783                       |
| Body mass index [kg/m <sup>2</sup> ]    | 25.7 (22.7;29.4)                    | 27.5 (23.5;29.4)                       | 0.077               | 25.5 (22.6;28.6)                      | 27.5 (24.0;29.4)                         | 0.064               | 26.1 (22.7;31.2)                     | 27.0 (23.3;30.2)                         | 0.800               | BMI > 30:<br>0.679          |
| Logistic EuroSCORE I                    | 23.3 (11.1;43.1)                    | 51.3 (27.2;71.9)                       | <b>&lt;0.001</b>    | 21.3 (11.1;41.6)                      | 48.4 (27.2;76.8)                         | <b>&lt;0.001</b>    | 26.9 (12.8;46.1)                     | 52.2 (25.7;68.4)                         | <b>0.002</b>        |                             |
| EuroSCORE II                            | 10.0 (4.2;22.1)                     | 26.8 (14.4;49.8)                       | <b>&lt;0.001</b>    | 9.7 (4.2;21.5)                        | 23.9 (15.4;53.9)                         | <b>&lt;0.001</b>    | 12.2 (4.3;25.6)                      | 30.0 (10.2;45.6)                         | <b>0.002</b>        |                             |
| Pulmonary hypertension <sup>1</sup>     | 65 (19.2%)                          | 21 (28.8%)                             | 0.067               | 46 (17.6%)                            | 14 (30.4%)                               | <b>0.042</b>        | 19 (24.7%)                           | 7 (25.9%)                                | 0.897               | 0.296                       |
| Peripheral arterial disease             | 26 (7.7%)                           | 10 (13.5%)                             | 0.106               | 24 (9.2%)                             | 4 (8.7%)                                 | 1.000               | 2 (2.6%)                             | 6 (21.4%)                                | <b>0.004</b>        | <b>0.020</b>                |
| Type 1 Diabetes mellitus                | 1 (0.3%)                            | 2 (2.7%)                               | 0.084               | 0 (0%)                                | 2 (4.3%)                                 | <b>0.022</b>        | 1 (1.3%)                             | 0 (0%)                                   | 1.000               |                             |
| Type 2 Diabetes mellitus                | 63 (18.6%)                          | 20 (27.0%)                             | 0.101               | 44 (16.8%)                            | 14 (30.4%)                               | <b>0.029</b>        | 19 (24.7%)                           | 6 (21.4%)                                | 0.730               | 0.136                       |
| IDDM                                    | 32 (9.4%)                           | 13 (17.6%)                             | <b>0.042</b>        | 22 (8.4%)                             | 8 (17.4%)                                | 0.100               | 10 (13.0%)                           | 5 (17.9%)                                | 0.538               | 0.543                       |
| Dialysis (acute and chronic)            | 28 (8.3%)                           | 17 (23.0%)                             | <b>&lt;0.001</b>    | 21 (8.0%)                             | 11 (23.9%)                               | <b>0.003</b>        | 7 (9.1%)                             | 6 (21.4%)                                | 0.103               | 0.704                       |
| Acute renal insufficiency               | 37 (10.9%)                          | 16 (21.6%)                             | <b>0.013</b>        | 29 (11.1%)                            | 13 (28.3%)                               | <b>0.002</b>        | 8 (10.4%)                            | 3 (10.7%)                                | 1.000               | 0.168                       |
| Chronic renal insufficiency             | 91 (26.8%)                          | 25 (33.8%)                             | 0.229               | 73 (27.9%)                            | 19 (41.3%)                               | 0.066               | 18 (23.4%)                           | 6 (21.4%)                                | 0.833               | 0.256                       |
| Chronic dialysis preoperative           | 9 (2.7%)                            | 9 (12.2%)                              | <b>0.001</b>        | 6 (2.3%)                              | 5 (10.9%)                                | <b>0.014</b>        | 3 (3.9%)                             | 4 (14.3%)                                | 0.080               | 0.817                       |
| NYHA IV                                 | 55 (16.4%)                          | 28 (37.8%)                             | <b>&lt;0.001</b>    | 46 (17.7%)                            | 19 (41.3%)                               | <b>&lt;0.001</b>    | 9 (11.8%)                            | 9 (32.1%)                                | <b>0.021</b>        | 0.907                       |
| Liver cirrhosis                         | 5 (1.5%)                            | 5 (6.8%)                               | <b>0.020</b>        | 5 (1.9%)                              | 4 (8.7%)                                 | <b>0.032</b>        | 0 (0%)                               | 1 (3.6%)                                 | 0.267               | 1.000                       |
| LVEF (%), 5.3% missings <sup>2</sup>    | 55 (50;55)                          | 55 (40;55)                             | <b>0.006</b>        | 55 (50;55)                            | 55 (27;55)                               | <b>0.017</b>        | 55 (55;56)                           | 55 (44;55)                               | 0.083               |                             |
| LVEF poor (<30)                         | 24 (7.5%)                           | 17 (23.9%)                             | <b>&lt;0.001</b>    | 23 (9.3%)                             | 12 (26.7%)                               | <b>0.001</b>        | 1 (1.4%)                             | 5 (19.2%)                                | <b>0.004</b>        | 0.186                       |
| CHD: Three-vessel disease               | 51 (15.1%)                          | 15 (20.3%)                             | 0.271               | 47 (18.0%)                            | 10 (21.7%)                               | 0.548               | 4 (5.2%)                             | 5 (17.9%)                                | 0.055               | 0.160                       |
| Previous cardiac surgery                | 129 (38.1%)                         | 42 (56.8%)                             | <b>0.003</b>        | 100 (38.2%)                           | 25 (54.3%)                               | <b>0.039</b>        | 29 (37.7%)                           | 17 (60.7%)                               | <b>0.035</b>        | 0.611                       |
| Combined valve surgery                  | 59 (17.4%)                          | 20 (27.0%)                             | 0.057               | 50 (19.1%)                            | 13 (28.3%)                               | 0.155               | 9 (11.7%)                            | 7 (25.0%)                                | 0.124               | 0.540                       |
| Cardiogenic shock                       | 10 (2.9%)                           | 11 (14.9%)                             | <b>&lt;0.001</b>    | 9 (3.4%)                              | 9 (19.6%)                                | <b>&lt;0.001</b>    | 1 (1.3%)                             | 2 (7.1%)                                 | 0.173               | 0.907                       |
| CPR ( $\leq$ 48h)                       | 5 (1.5%)                            | 4 (5.4%)                               | 0.059               | 5 (1.9%)                              | 3 (6.5%)                                 | 0.101               | 0 (0%)                               | 1 (3.6%)                                 | 0.267               | 1.000                       |
| Emergency                               | 67 (19.8%)                          | 23 (31.1%)                             | <b>0.033</b>        | 57 (21.8%)                            | 15 (32.6%)                               | 0.109               | 10 (13.0%)                           | 8 (28.6%)                                | 0.080               | 0.501                       |
| Transfer from ICU                       | 78 (23.0%)                          | 31 (42.5%)                             | <b>0.001</b>        | 63 (24.0%)                            | 17 (37.8%)                               | 0.053               | 15 (19.5%)                           | 14 (50.0%)                               | <b>0.002</b>        | 0.189                       |
| Intubated at admission                  | 28 (8.3%)                           | 10 (13.5%)                             | 0.157               | 24 (9.2%)                             | 5 (10.9%)                                | 0.783               | 4 (5.2%)                             | 5 (17.9%)                                | 0.055               | 0.178                       |
| Stroke                                  | 56 (16.5%)                          | 20 (27.0%)                             | <b>0.035</b>        | 41 (15.6%)                            | 12 (26.1%)                               | 0.084               | 15 (19.5%)                           | 8 (28.6%)                                | 0.319               | 0.824                       |
| Embolization of several organs          | 20 (5.9%)                           | 8 (10.8%)                              | 0.128               | 11 (4.2%)                             | 6 (13.0%)                                | <b>0.027</b>        | 9 (11.7%)                            | 2 (7.1%)                                 | 0.723               | 0.069                       |
| Fever until surgery                     | 48 (14.5%)                          | 15 (20.3%)                             | 0.211               | 37 (14.4%)                            | 11 (23.9%)                               | 0.104               | 11 (14.7%)                           | 4 (14.3%)                                | 1.000               | 0.376                       |
| Time from diagnosis to surgery > 7 days | 203 (60.4%)                         | 40 (54.1%)                             | 0.313               | 158 (60.8%)                           | 22 (47.8%)                               | 0.100               | 45 (59.2%)                           | 18 (64.3%)                               | 0.639               | 0.186                       |

|                                                |                  |                   |                  |                  |                   |                  |                  |                   |              |                 |
|------------------------------------------------|------------------|-------------------|------------------|------------------|-------------------|------------------|------------------|-------------------|--------------|-----------------|
| Time from antibiotic start to surgery < 7 days | 114 (34.1%)      | 30 (40.5%)        | 0.297            | 88 (34.1%)       | 23 (50.0%)        | <b>0.039</b>     | 26 (34.2%)       | 7 (25.0%)         | 0.371        | 0.063           |
| <b>Pathogens</b>                               |                  |                   |                  |                  |                   |                  |                  |                   |              |                 |
| Staphylococcus aureus                          | 60 (17.8%)       | 22 (29.7%)        | <b>0.020</b>     | 46 (17.7%)       | 13 (28.3%)        | 0.094            | 14 (18.2%)       | 9 (32.1%)         | 0.126        | 0.808           |
| Streptococcus viridans                         | 42 (12.5%)       | 1 (1.4%)          | <b>0.005</b>     | 35 (13.5%)       | 0 (0%)            | <b>0.008</b>     | 7 (9.1%)         | 1 (3.6%)          | 0.679        | 0.998           |
| Grampos. Streptococcus                         | 36 (10.7%)       | 1 (1.4%)          | <b>0.011</b>     | 25 (9.6%)        | 1 (2.2%)          | 0.147            | 11 (14.3%)       | 0 (0%)            | <b>0.034</b> | 0.999           |
| Culture negative IE                            | 87 (25.8%)       | 26 (35.1%)        | 0.104            | 66 (25.4%)       | 19 (41.3%)        | <b>0.026</b>     | 21 (27.3%)       | 7 (25.0%)         | 0.816        | 0.163           |
| Isolated aortic valve IE                       | 115 (33.9%)      | 13 (17.6%)        | <b>0.006</b>     | 95 (36.3%)       | 12 (26.1%)        | 0.181            | 20 (26.0%)       | 1 (3.6%)          | <b>0.011</b> | 0.111           |
| Aortic valve IE                                | 148 (43.7%)      | 20 (27.0%)        | <b>0.008</b>     | 120 (45.8%)      | 17 (37.0%)        | 0.266            | 28 (36.4%)       | 3 (10.7%)         | <b>0.011</b> | 0.103           |
| Isolated prosthetic endocarditis               | 111 (32.7%)      | 32 (43.2%)        | 0.085            | 86 (32.8%)       | 18 (39.1%)        | 0.404            | 25 (32.5%)       | 14 (50.0%)        | 0.100        | 0.411           |
| Prosthetic endocarditis                        | 121 (35.7%)      | 38 (51.4%)        | <b>0.012</b>     | 92 (35.1%)       | 23 (50.0%)        | 0.054            | 29 (37.7%)       | 15 (53.6%)        | 0.144        | 0.952           |
| Aortic valve insufficiency <sup>3</sup>        | 99 (29.3%)       | 9 (12.3%)         | <b>0.003</b>     | 79 (30.3%)       | 8 (17.8%)         | 0.086            | 20 (26.0%)       | 1 (3.6%)          | <b>0.011</b> | 0.169           |
| Peri-annular bscess                            | 77 (23.1%)       | 36 (48.6%)        | <b>&lt;0.001</b> | 59 (22.9%)       | 22 (47.8%)        | <b>&lt;0.001</b> | 18 (24.0%)       | 14 (50.0%)        | <b>0.011</b> | 0.967           |
| Combined surgery <sup>4</sup>                  | 153 (45.1%)      | 40 (55.6%)        | 0.108            | 118 (45.0%)      | 28 (63.6%)        | <b>0.022</b>     | 35 (45.5%)       | 12 (42.9%)        | 0.813        | 0.122           |
| <b>Preoperative laboratory</b>                 |                  |                   |                  |                  |                   |                  |                  |                   |              |                 |
| CRP (mg/L)                                     | 37.0 (14.6;76.1) | 76.6 (44.9;141.6) | <b>&lt;0.001</b> | 37.7 (16.0;76.0) | 84.0 (46.4;138.3) | <b>&lt;0.001</b> | 26.8 (11.9;77.7) | 66.4 (43.0;162.0) | <b>0.001</b> | CRP > 40: 0.739 |

Significant *p*-values are indicated in bold. Quantitative data are presented as median with 25<sup>th</sup> and 75<sup>th</sup> percentiles, while categorical data are presented as number of patients (n) with percentage (%).<sup>1</sup> Pulmonary hypertension: sPAP >25 mmHg, <sup>2</sup> Missing values > 5%, <sup>3</sup> at least grade 2, medium, <sup>4</sup> with CABG, ventricular septal defect/atrial septal defect-closure or other. **EuroSCORE**: European System for Cardiac Operative Risk Evaluation; **IDDm**, insulin dependent diabetes mellitus; **NYHA**, New York Heart Association heart failure stage; **LVEF**, left ventricular ejection fraction; **CHD**, coronary heart disease; **CPR**, cardiopulmonary resuscitation; **ICU**, intensive care unit; **CRP**, C-reactive protein
