# Supplementary figures and images for: Sex-Specific Risk Factors for Short- and Long-Term Outcomes after Surgery in Patients with Infective Endocarditis
Source: MDPI journal article supplement (doi:10.3390/jcm11071875), 2022-03-28

Figure S1: Flow chart of case numbers over the course of the study.

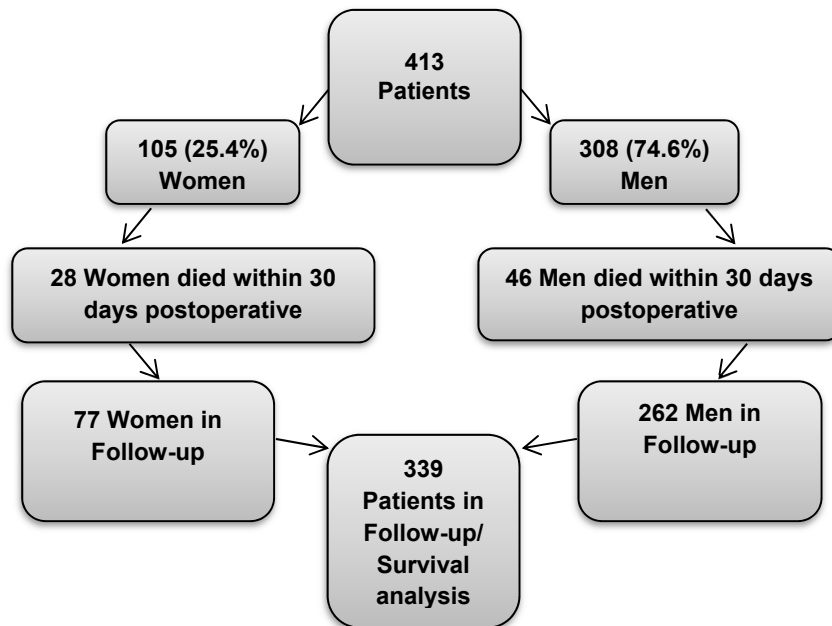

Supplement: s1 [file s1]
